# Supplementary figures and images for: Apelin Alleviates Meniscus Endothelial Cell Apoptosis in Osteoarthritis
Source: Hindawi journal article supplement (doi:10.1155/2022/3556372), 2022-01-13

# Supplementary figure 1

A

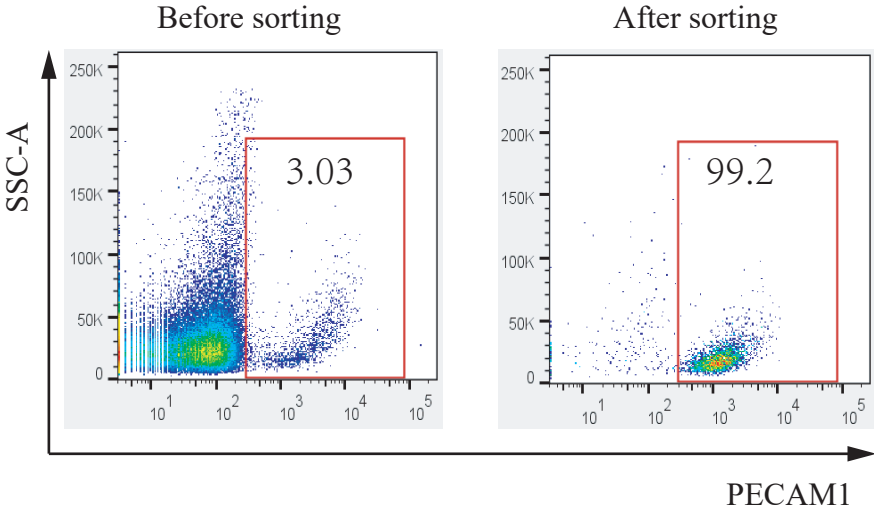

B

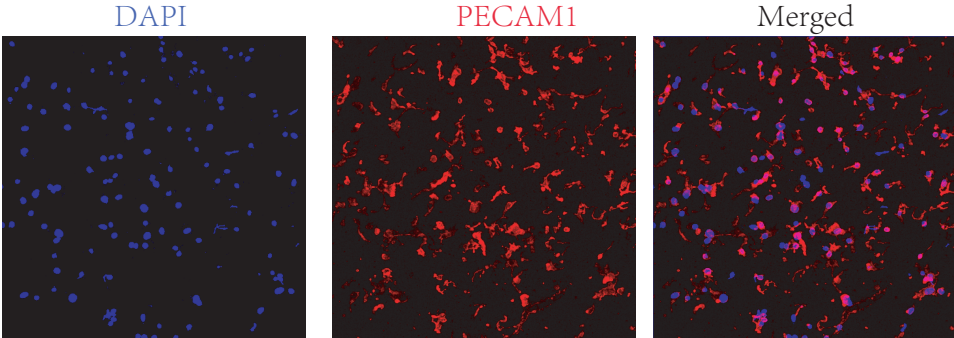

Supplement: f1 [file 3556372.f1.pdf]

## Supplementary figure 2

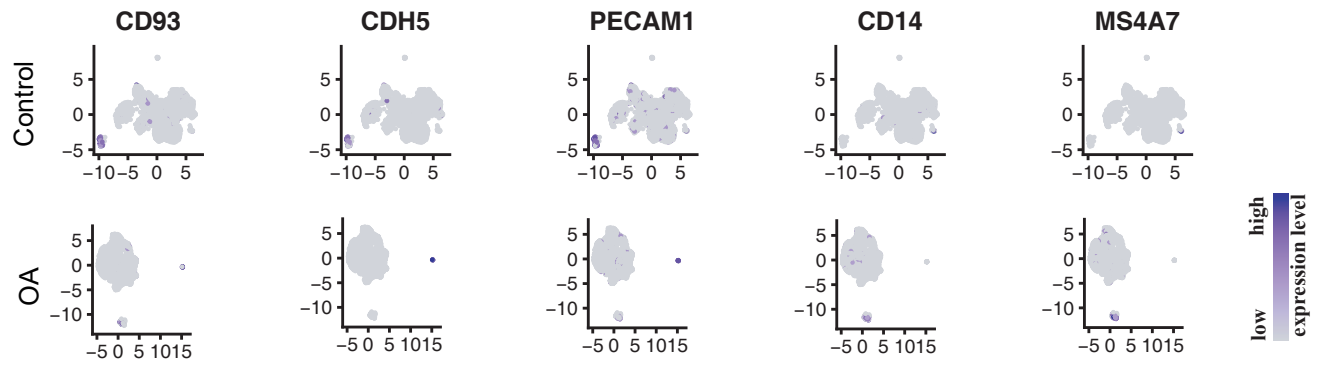

Supplement: f2 [file 3556372.f2.pdf]

### Supplementary figure 3

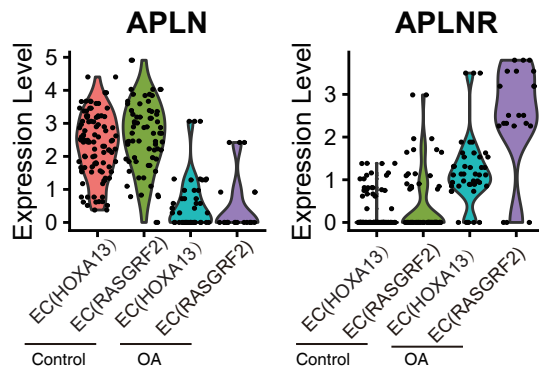

Supplement: f3 [file 3556372.f3.pdf]
